# Supplementary material for: Landscape Effects on the Cabbage Seedpod Weevil, Ceutorhynchus obstrictus (Coleoptera: Curculionidae), and on Its Parasitoid, Trichomalus perfectus (Hymenoptera: Pteromalidae), in Canola
Source: MDPI journal article supplement (doi:10.3390/insects14040327), 2023-03-28
Supplement: s1 [file s1]

## Supplementary Materials

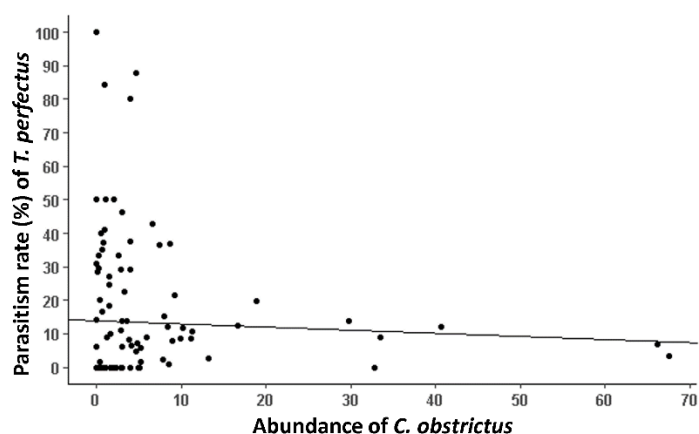

**Figure S1.** Relation between *T. perfectus* parasitism rate (mean in %) and CSW abundance (average number).

**Table S1.** Final models representing the effects of landscape predictors on (i) CSW infestation rate (data were arcsine-square-root transformed) and on (ii) CSW abundance (data were log transformed).

| Dependent variable                 | Predictor     | Estimate   | df     | t-value | CI             | p-value          |
|------------------------------------|---------------|------------|--------|---------|----------------|------------------|
| <b>CSW infestation</b>             | (Intercept)   | 0.09       | 11.41  | 1.69    | [- 0.01, 0.19] | 0.091            |
|                                    | % of roads    | 1.20       | 125.62 | 3.69    | [0.56, 1.84]   | <b>&lt;0.001</b> |
|                                    | % of cereals  | 0.14       | 126.98 | 2.05    | [0.01, 0.28]   | <b>0.041</b>     |
| Observations                       | 139           | $\sigma^2$ | 7.98   |         |                |                  |
| Marginal $R^2$ / Conditional $R^2$ | 0.000 / 0.002 | ICC        | 0.00   |         |                |                  |
| <b>CSW abundance</b>               | (Intercept)   | 0.66       | 8.76   | 2.20    | [0.07, 1.25]   | <b>0.029</b>     |
|                                    | % of roads    | 8.17       | 122.49 | 3.26    | [3.21, 13.13]  | <b>0.001</b>     |
|                                    | % of cereals  | 1.09       | 125.37 | 2.09    | [0.06, 2.13]   | <b>0.039</b>     |
| Observations                       | 134           | $\sigma^2$ | 0.46   |         |                |                  |
| Marginal $R^2$ / Conditional $R^2$ | 0.050 / 0.595 | ICC        | 0.57   |         |                |                  |

**Table S2.** Final model representing effects of landscape predictors on *T. perfectus* parasitism rate.

| <b>Predictor</b>                                              | <b>Estimate</b> | <b>SE</b>  | <b>z-value</b> | <b>CI</b>      | <b>p-value</b>   |
|---------------------------------------------------------------|-----------------|------------|----------------|----------------|------------------|
| (Intercept)                                                   | -3.88           | 0.62       | -6.22          | [0.01, 0.07]   | <b>&lt;0.001</b> |
| Hedgerow length                                               | - 0.04          | 0.01       | - 5.70         | [0.95, 0.98]   | <b>&lt;0.001</b> |
| Distance to water                                             | - 0.03          | 0.01       | - 3.31         | [0.96, 0.99]   | <b>0.001</b>     |
| % of roads                                                    | -5.22           | 1.52       | -3.44          | [0.00, 0.11]   | <b>0.001</b>     |
| Shannon index<br>(total)                                      | 1.12            | 0.24       | 4.64           | [1.91, 4.93]   | <b>&lt;0.001</b> |
| Average<br>perimeter-to-area<br>ratio of crops                | 3.13            | 0.84       | 3.71           | [4.38, 119.51] | <b>&lt;0.001</b> |
| % hay/pastures                                                | 1.47            | 0.46       | 3.23           | [1.79, 10.69]  | <b>0.001</b>     |
| Abundance of<br>CSW                                           | 0.00            | 0.00       | 0.63           | [0.99, 1.01]   | 0.53             |
| % of soybean                                                  | 1.93            | 0.72       | 2.66           | [1.66, 28.40]  | <b>0.008</b>     |
| <i>Observations</i>                                           | 112             | $\sigma^2$ | 3.29           |                |                  |
| <i>Marginal R<sup>2</sup> /<br/>Conditional R<sup>2</sup></i> | 0.050 / 0.280   | ICC        | 0.24           |                |                  |
